# Supplementary material
Source: bioRxiv or medRxiv preprint supplement (https://www.biorxiv.org/highwire/filestream/21482/field_highwire_adjunct_files/9/077701-5.pdf)

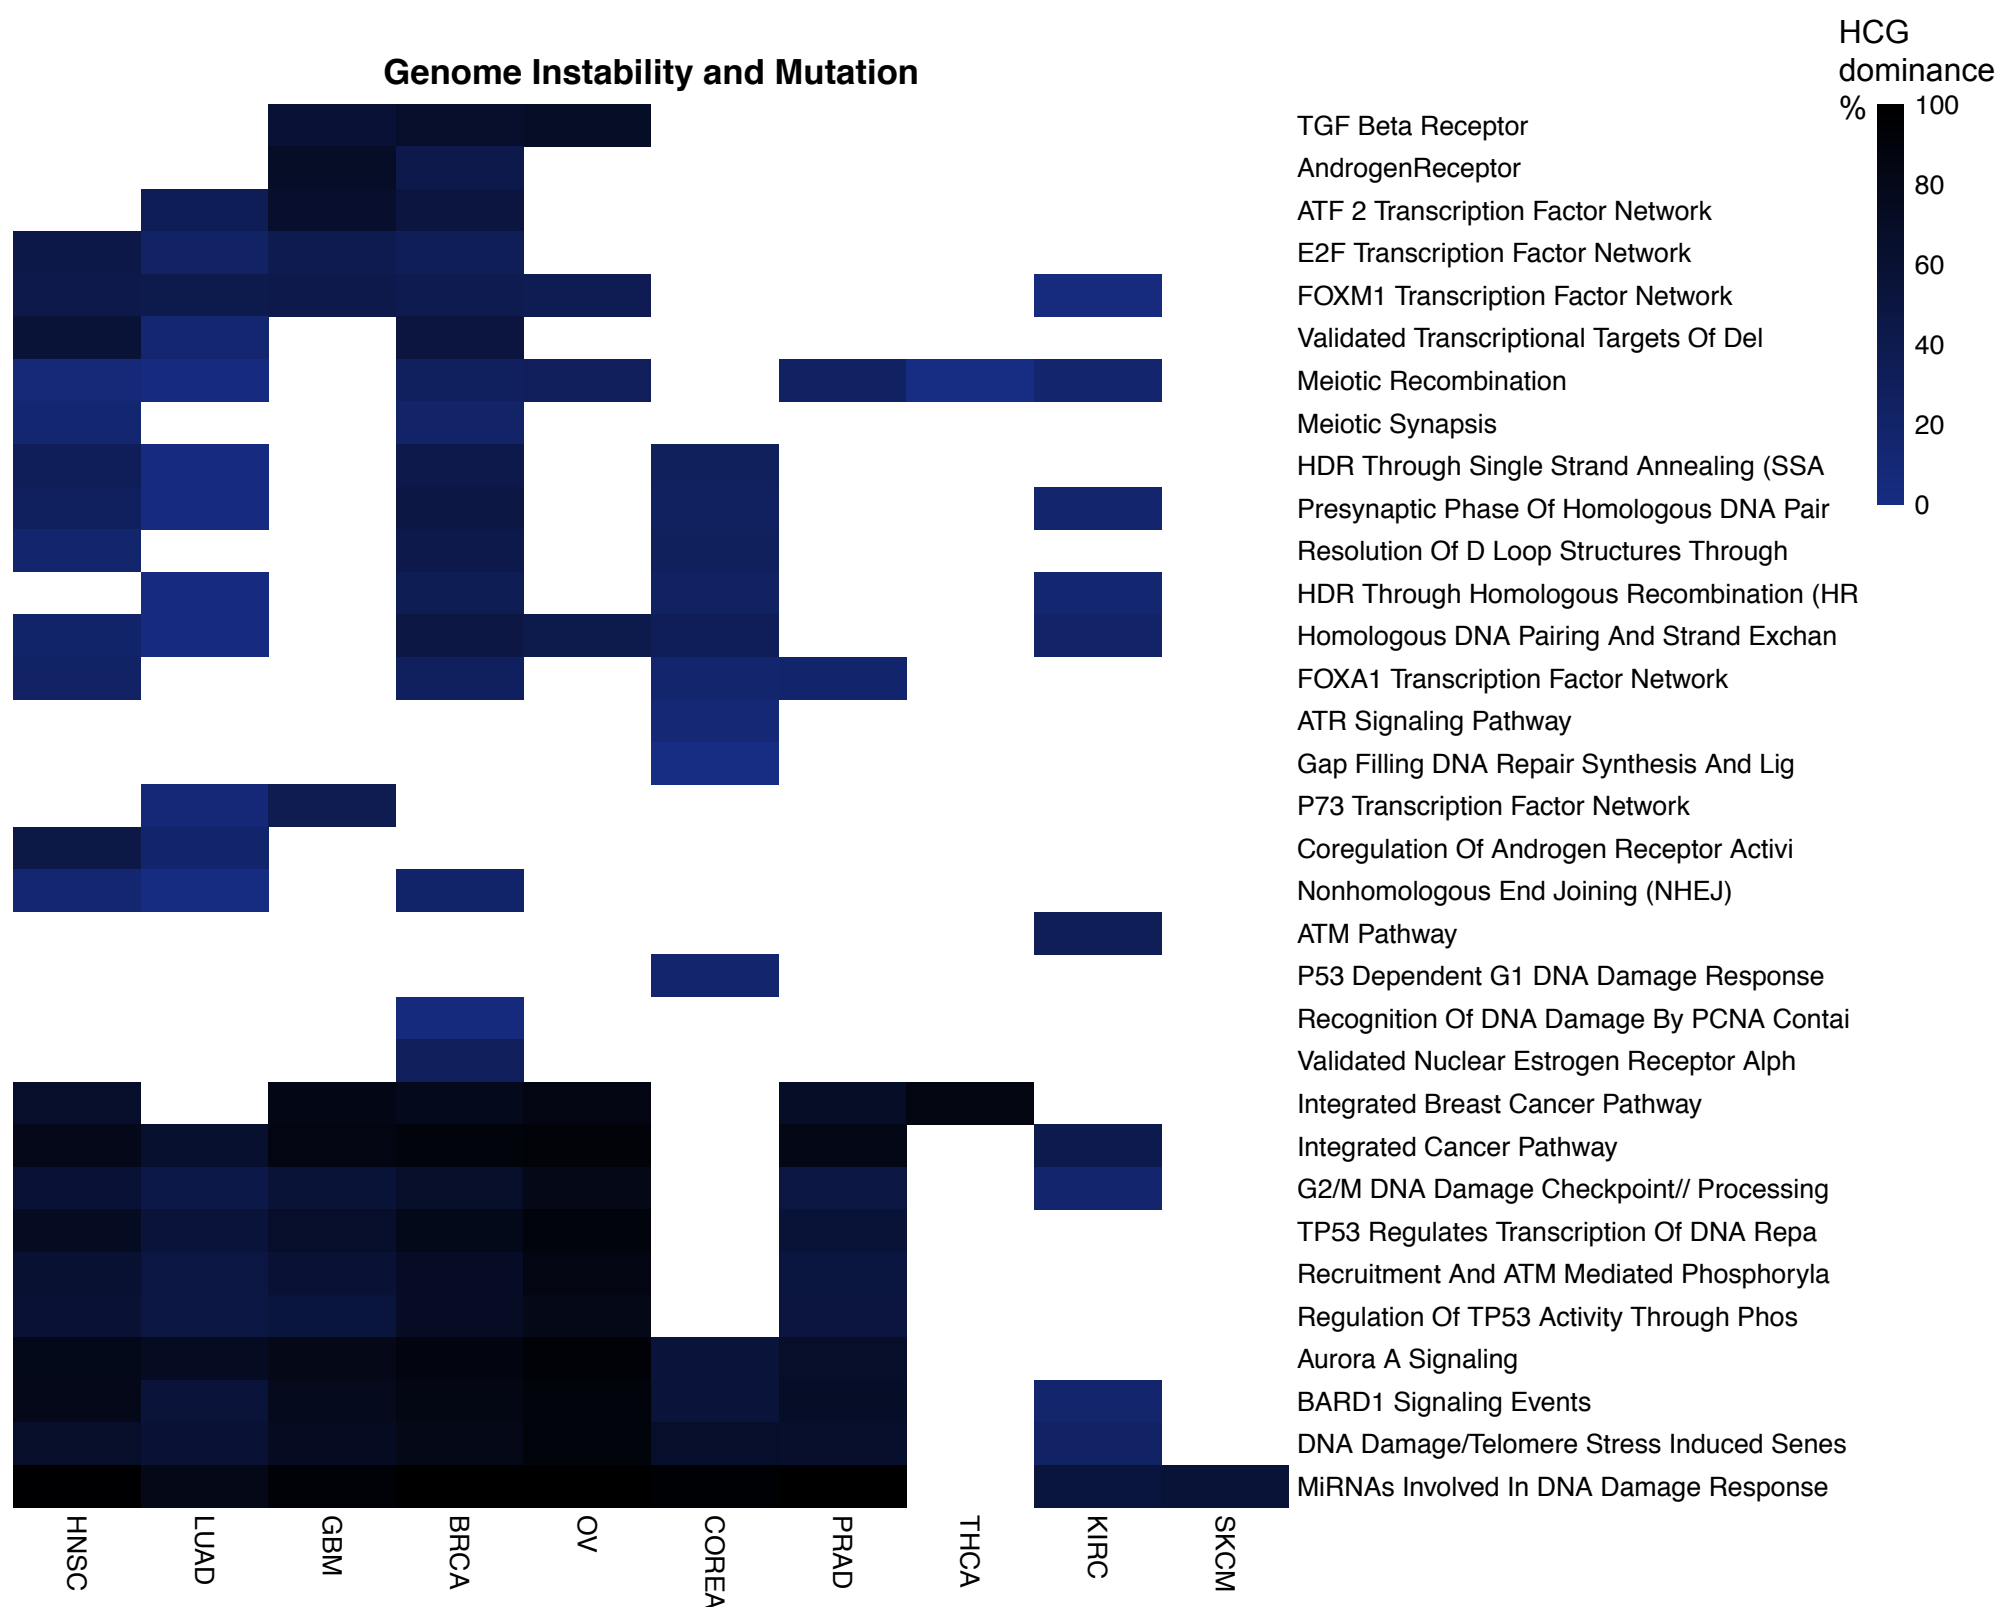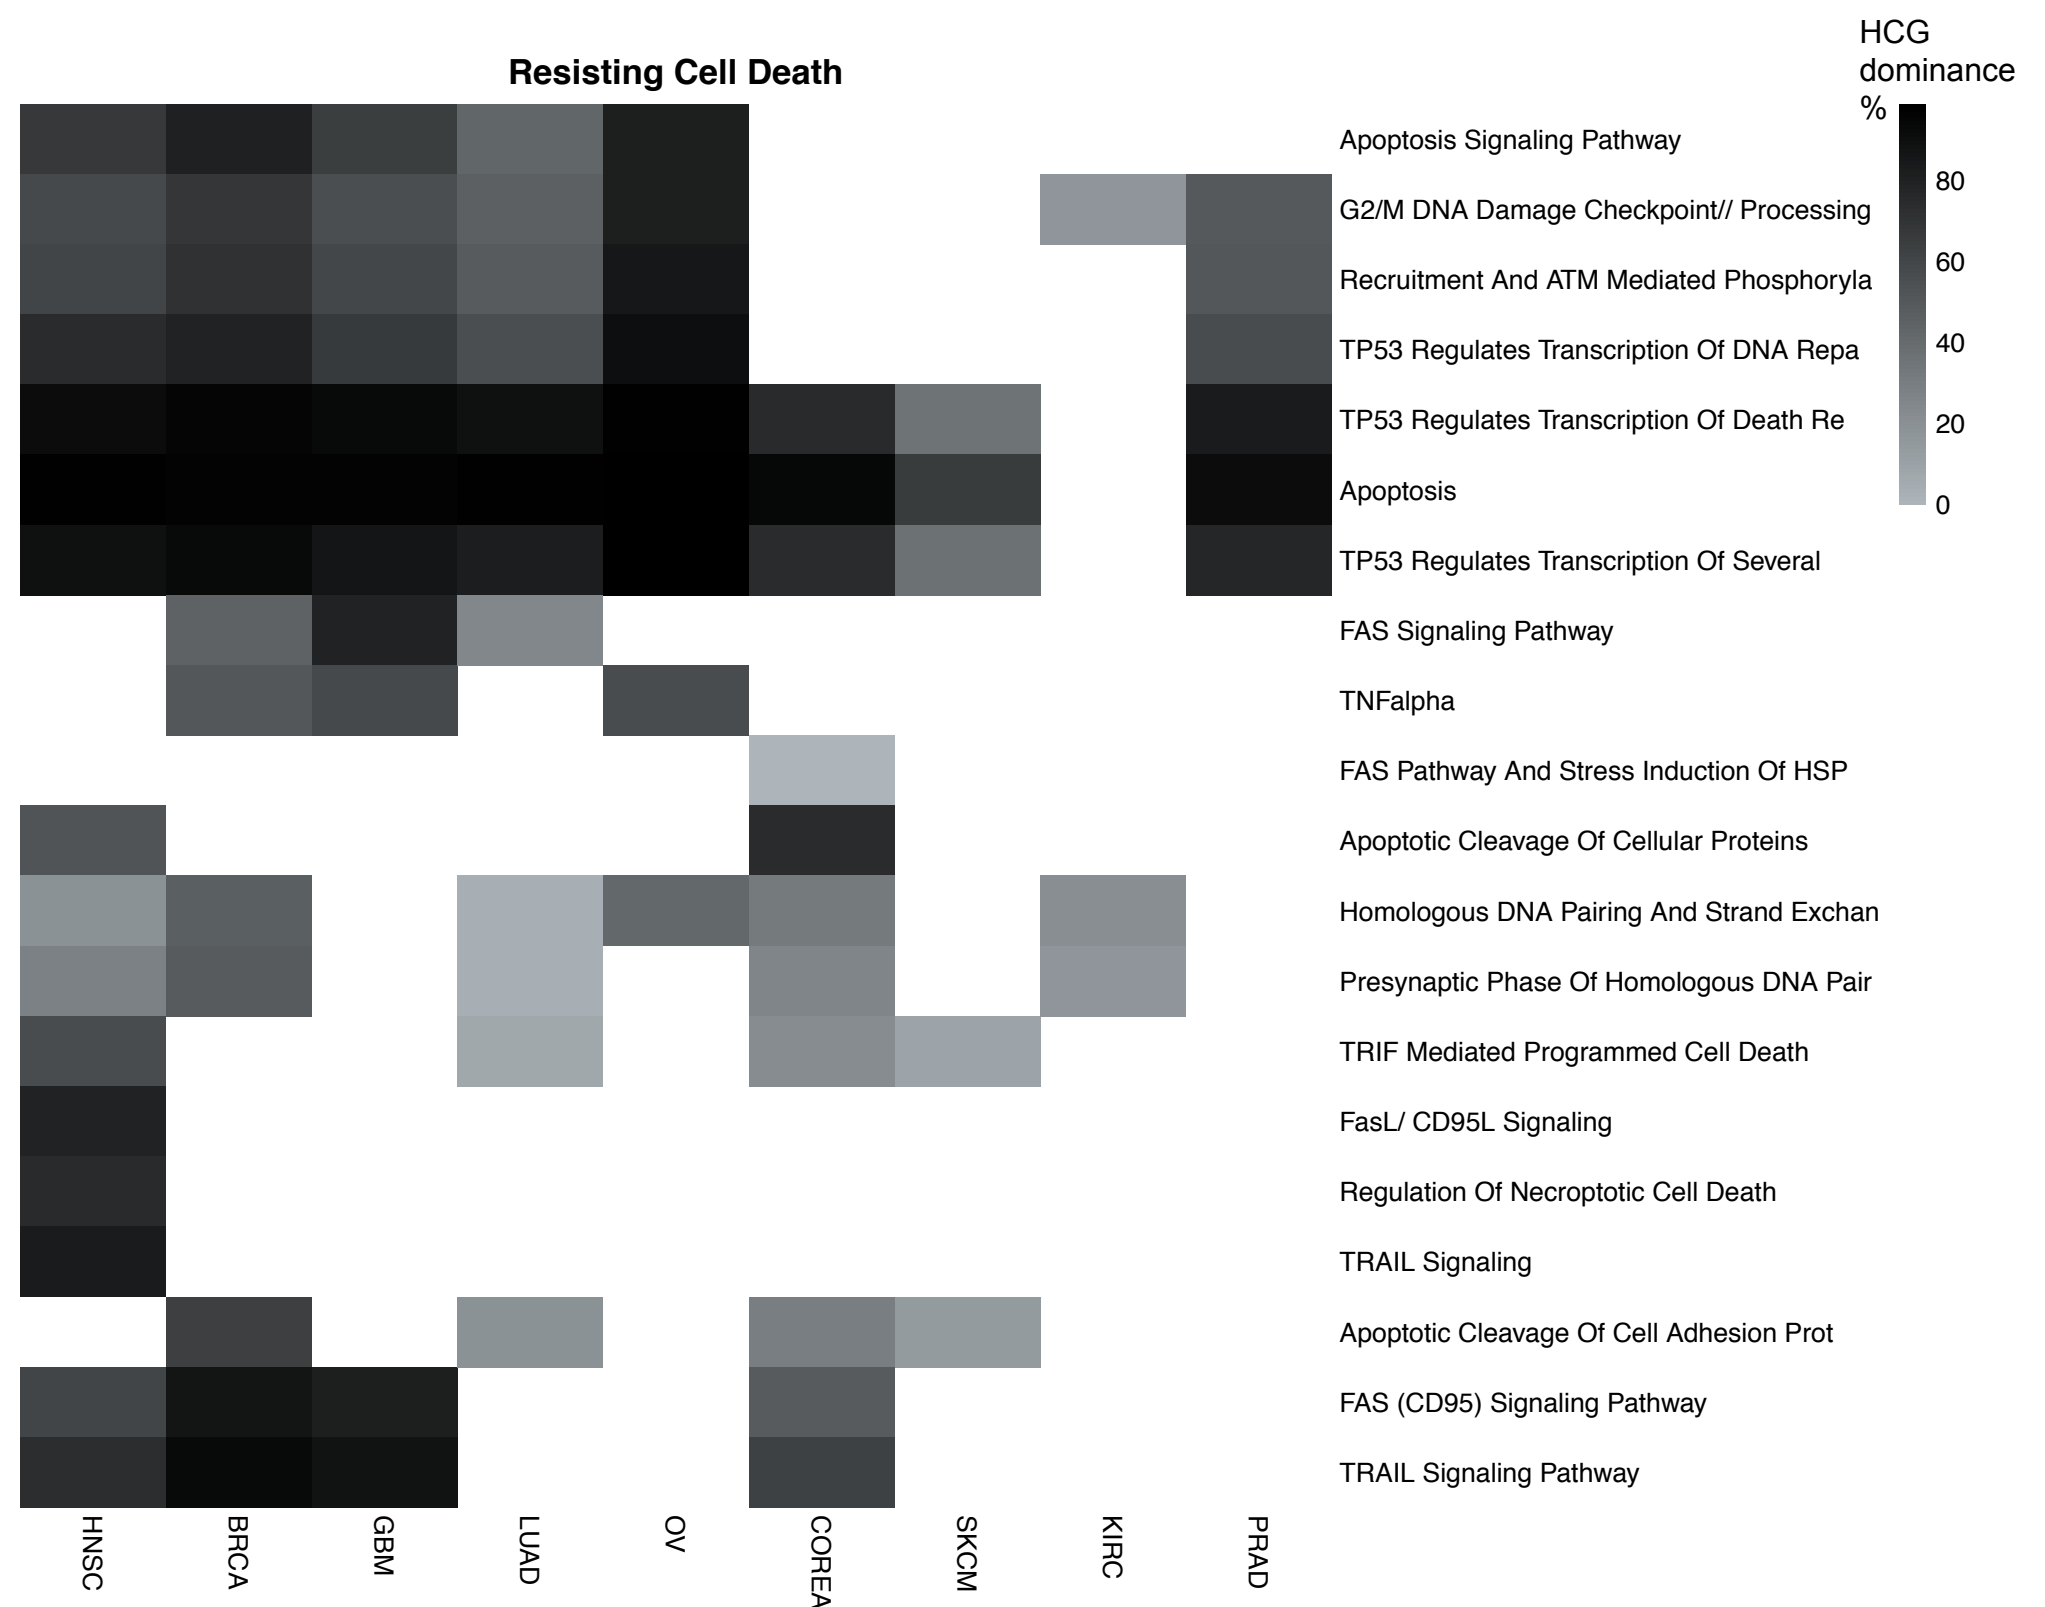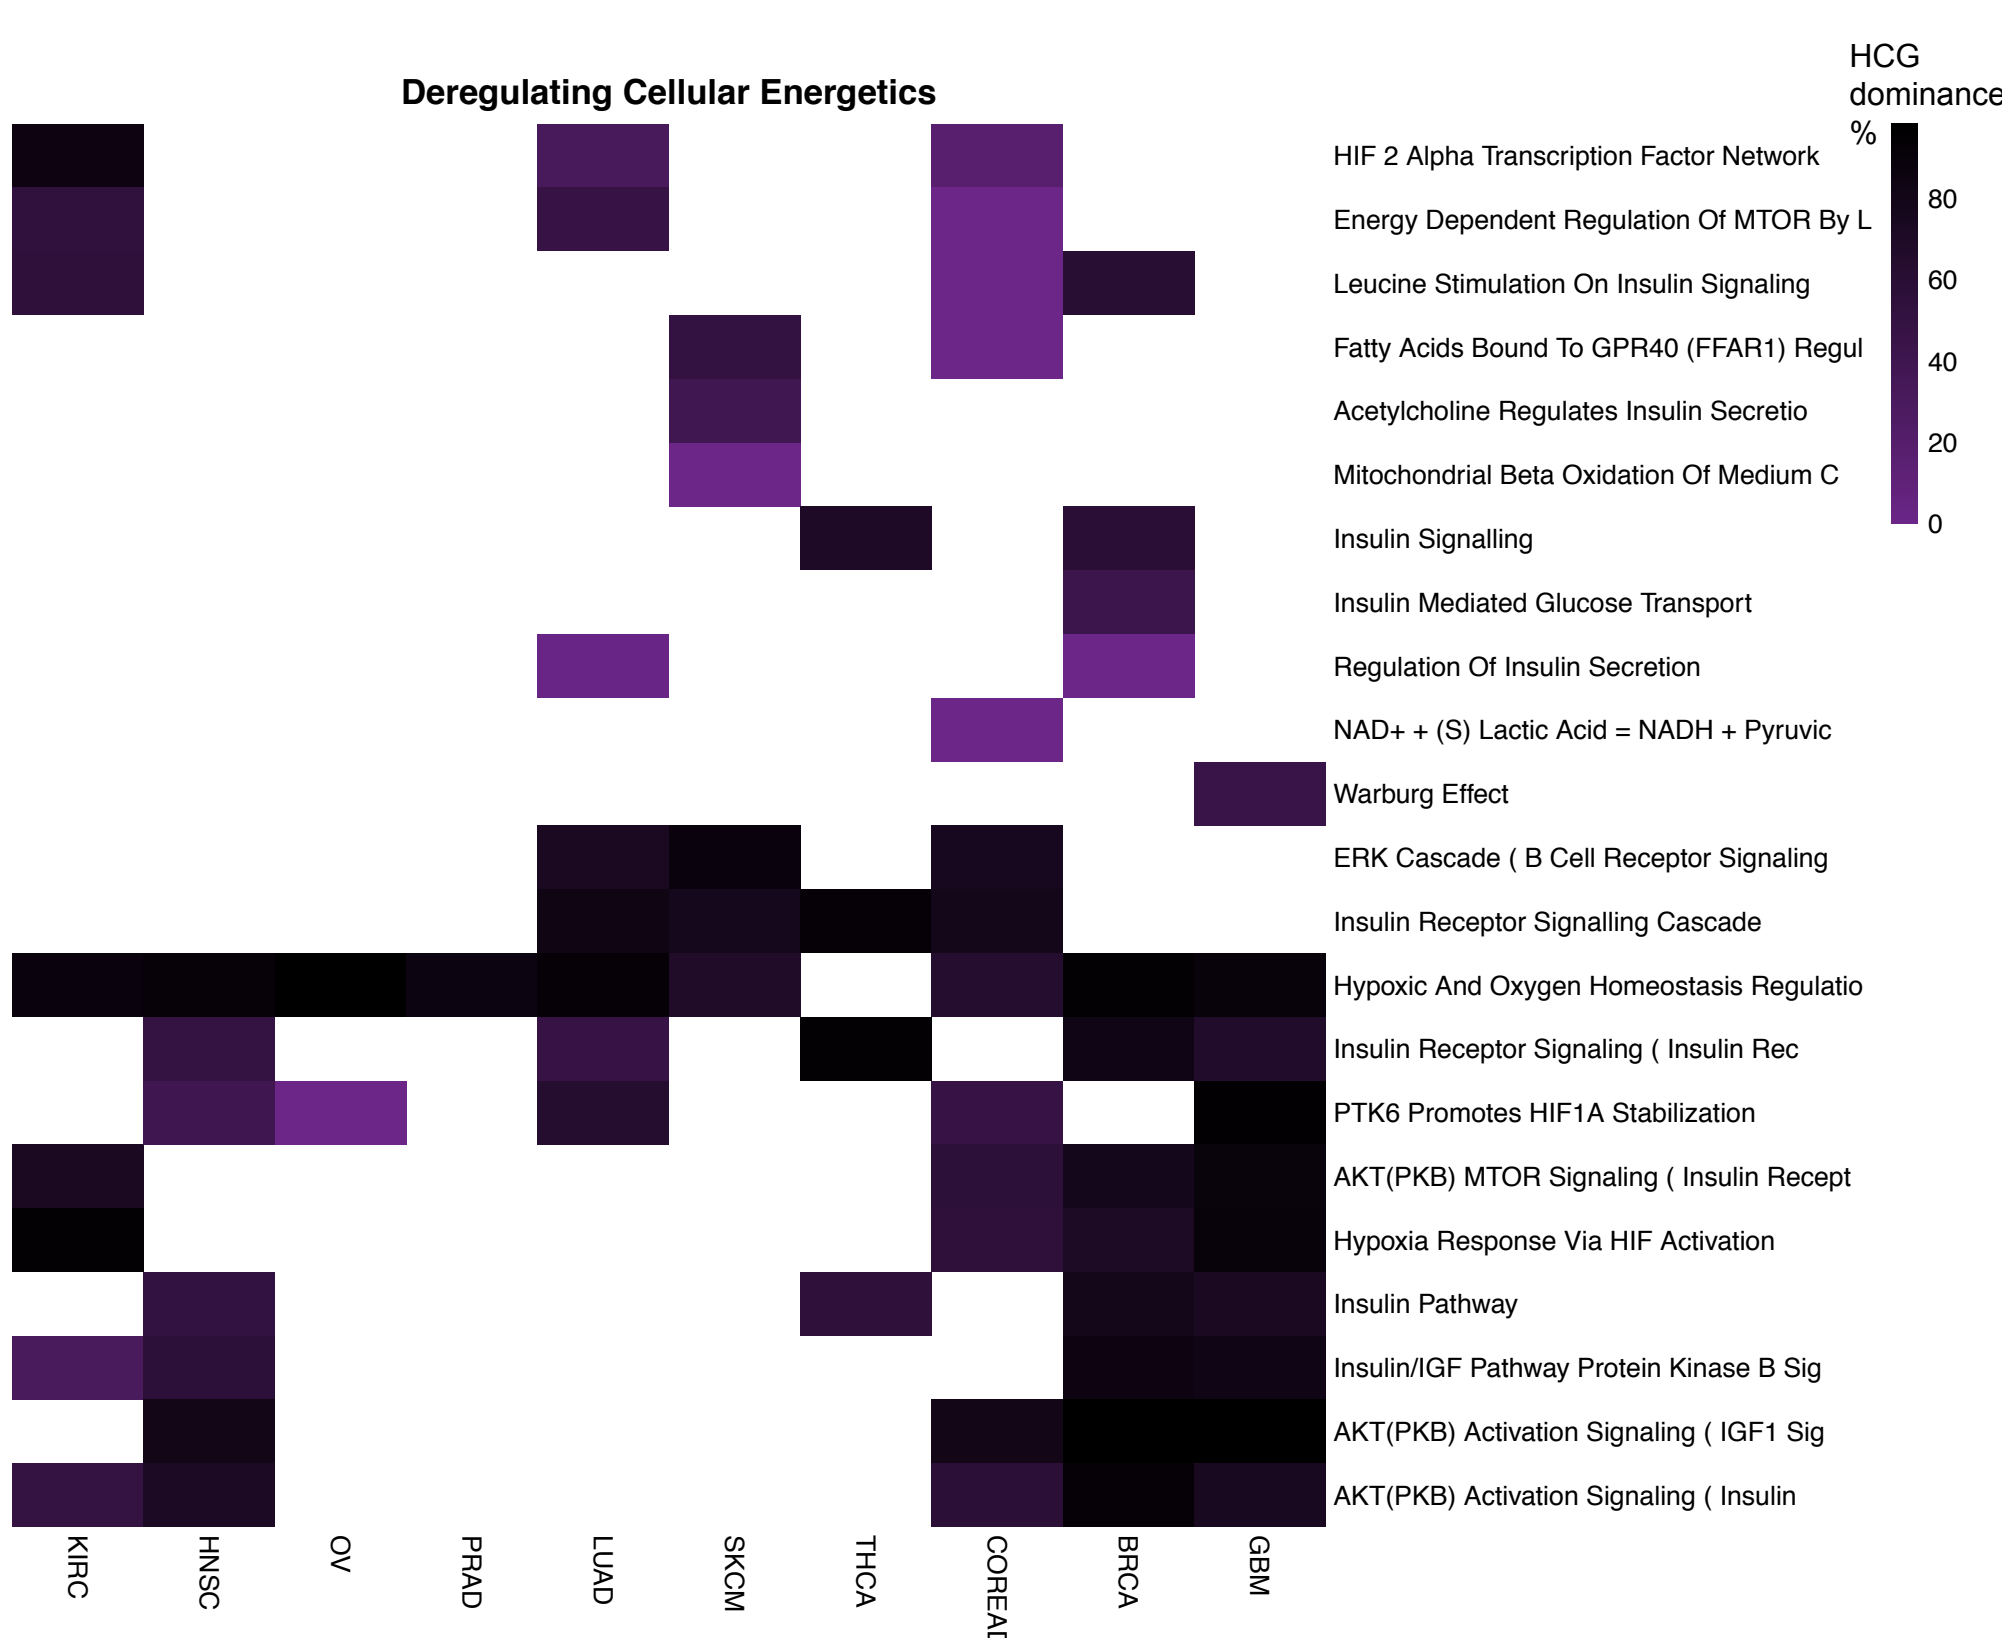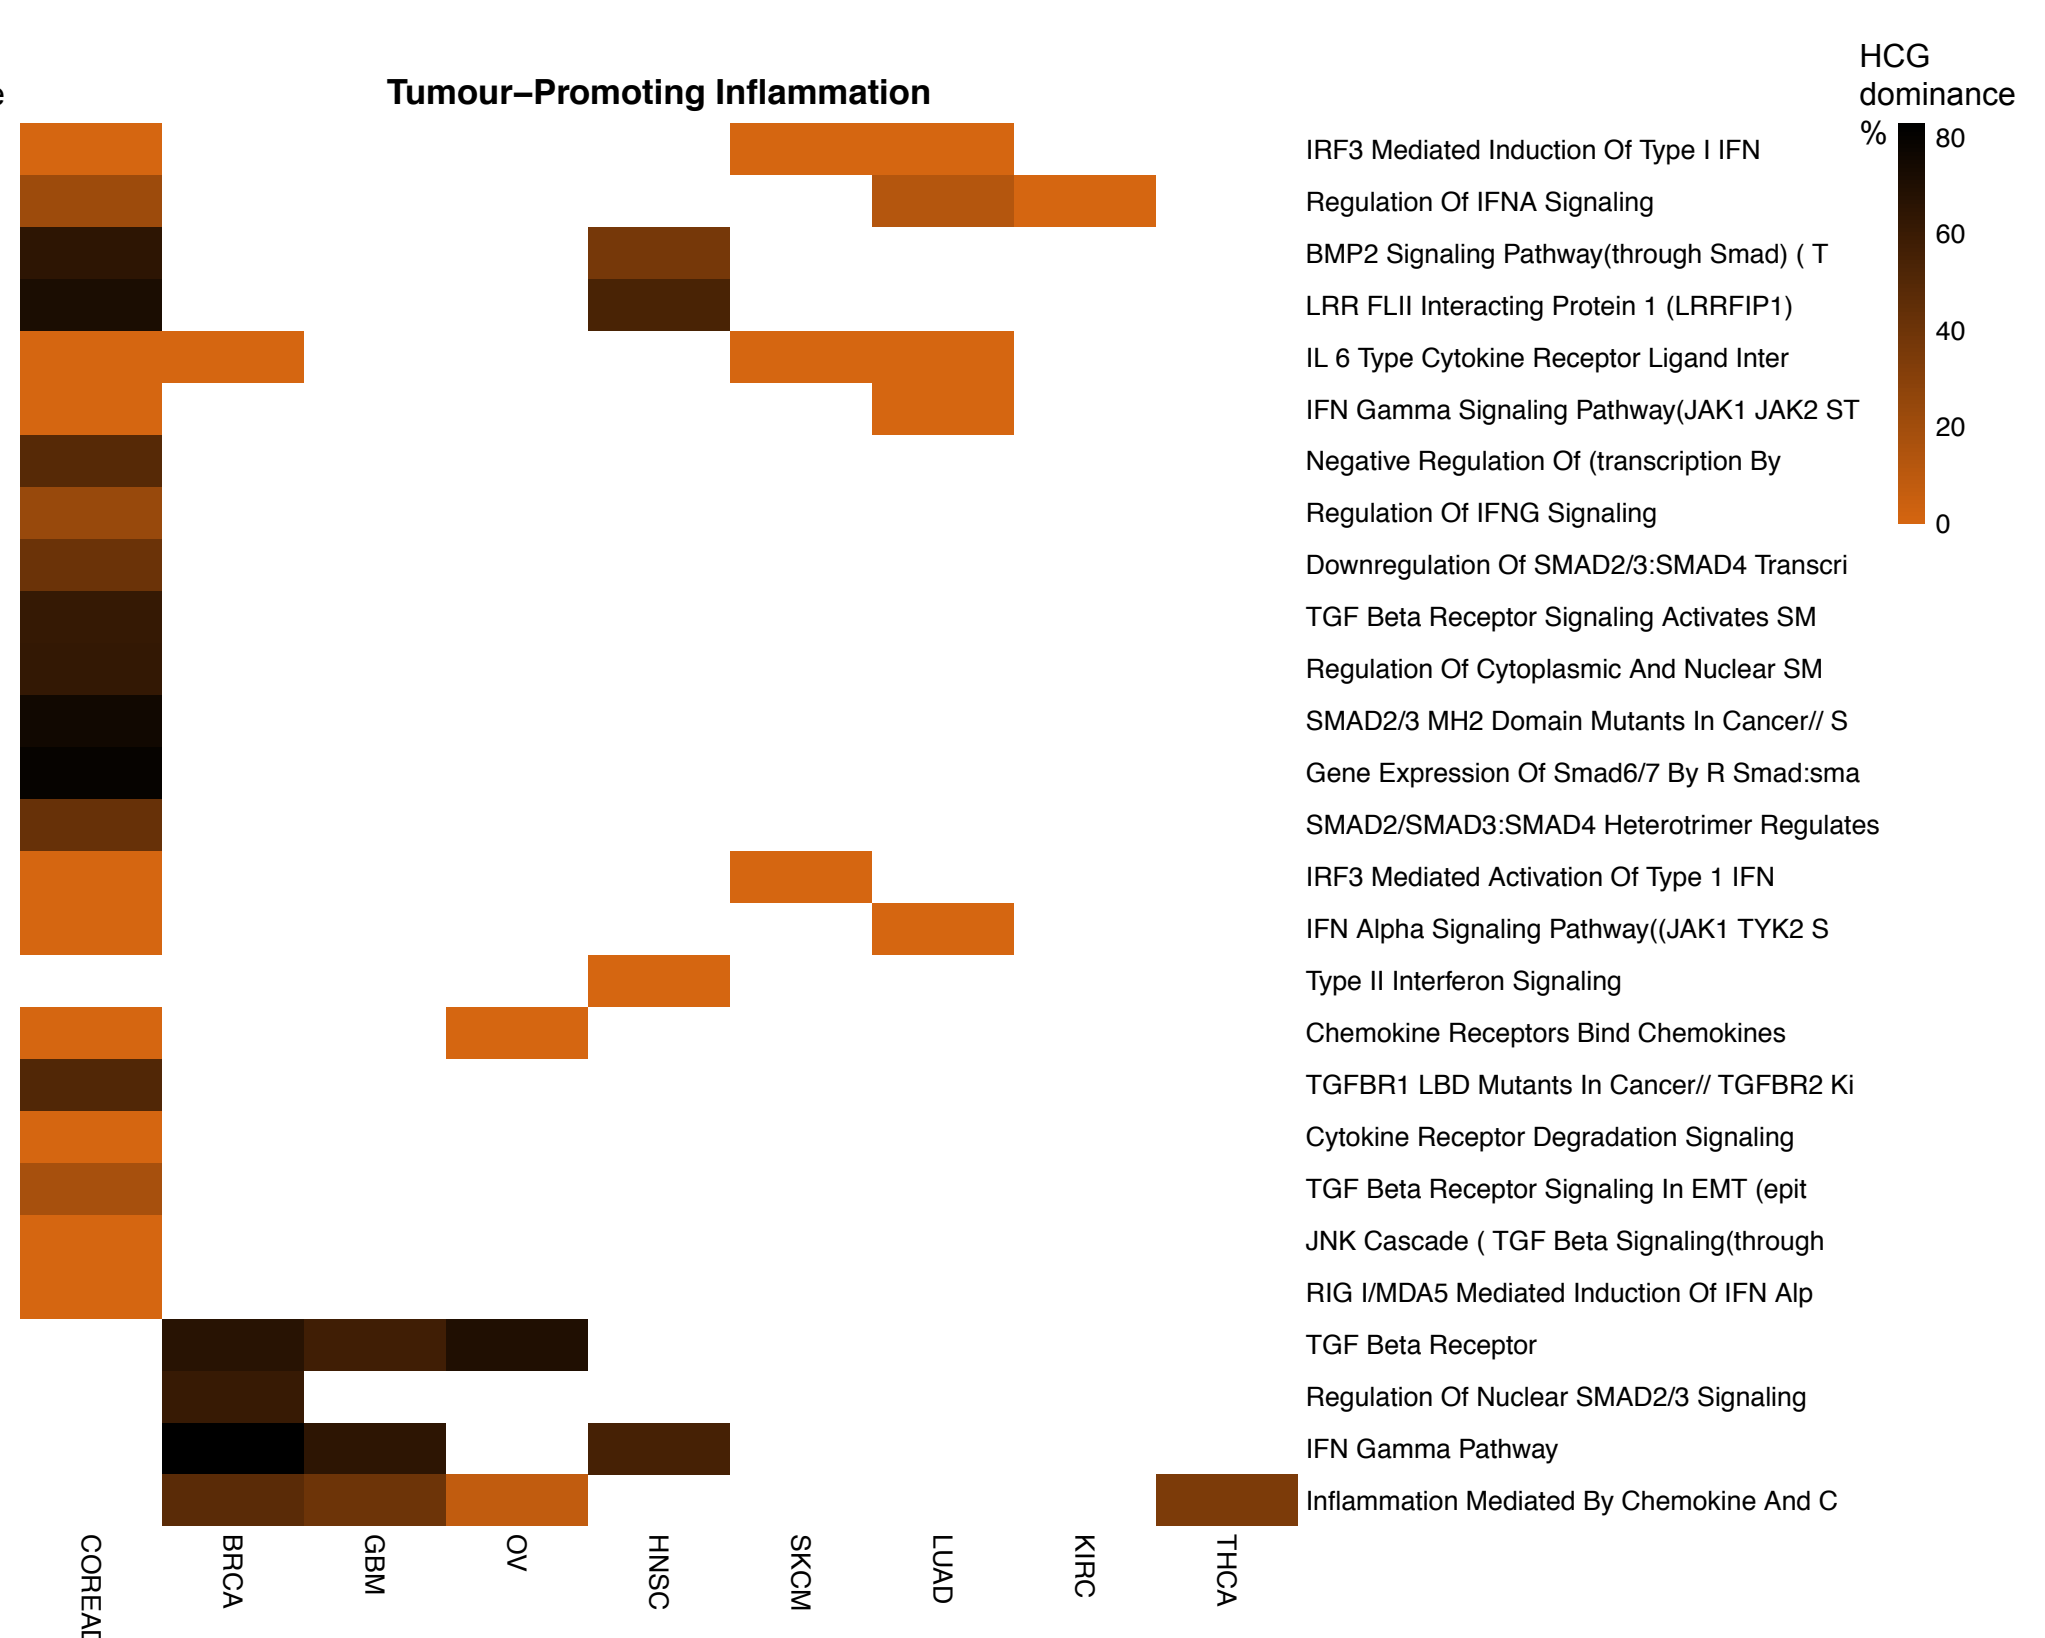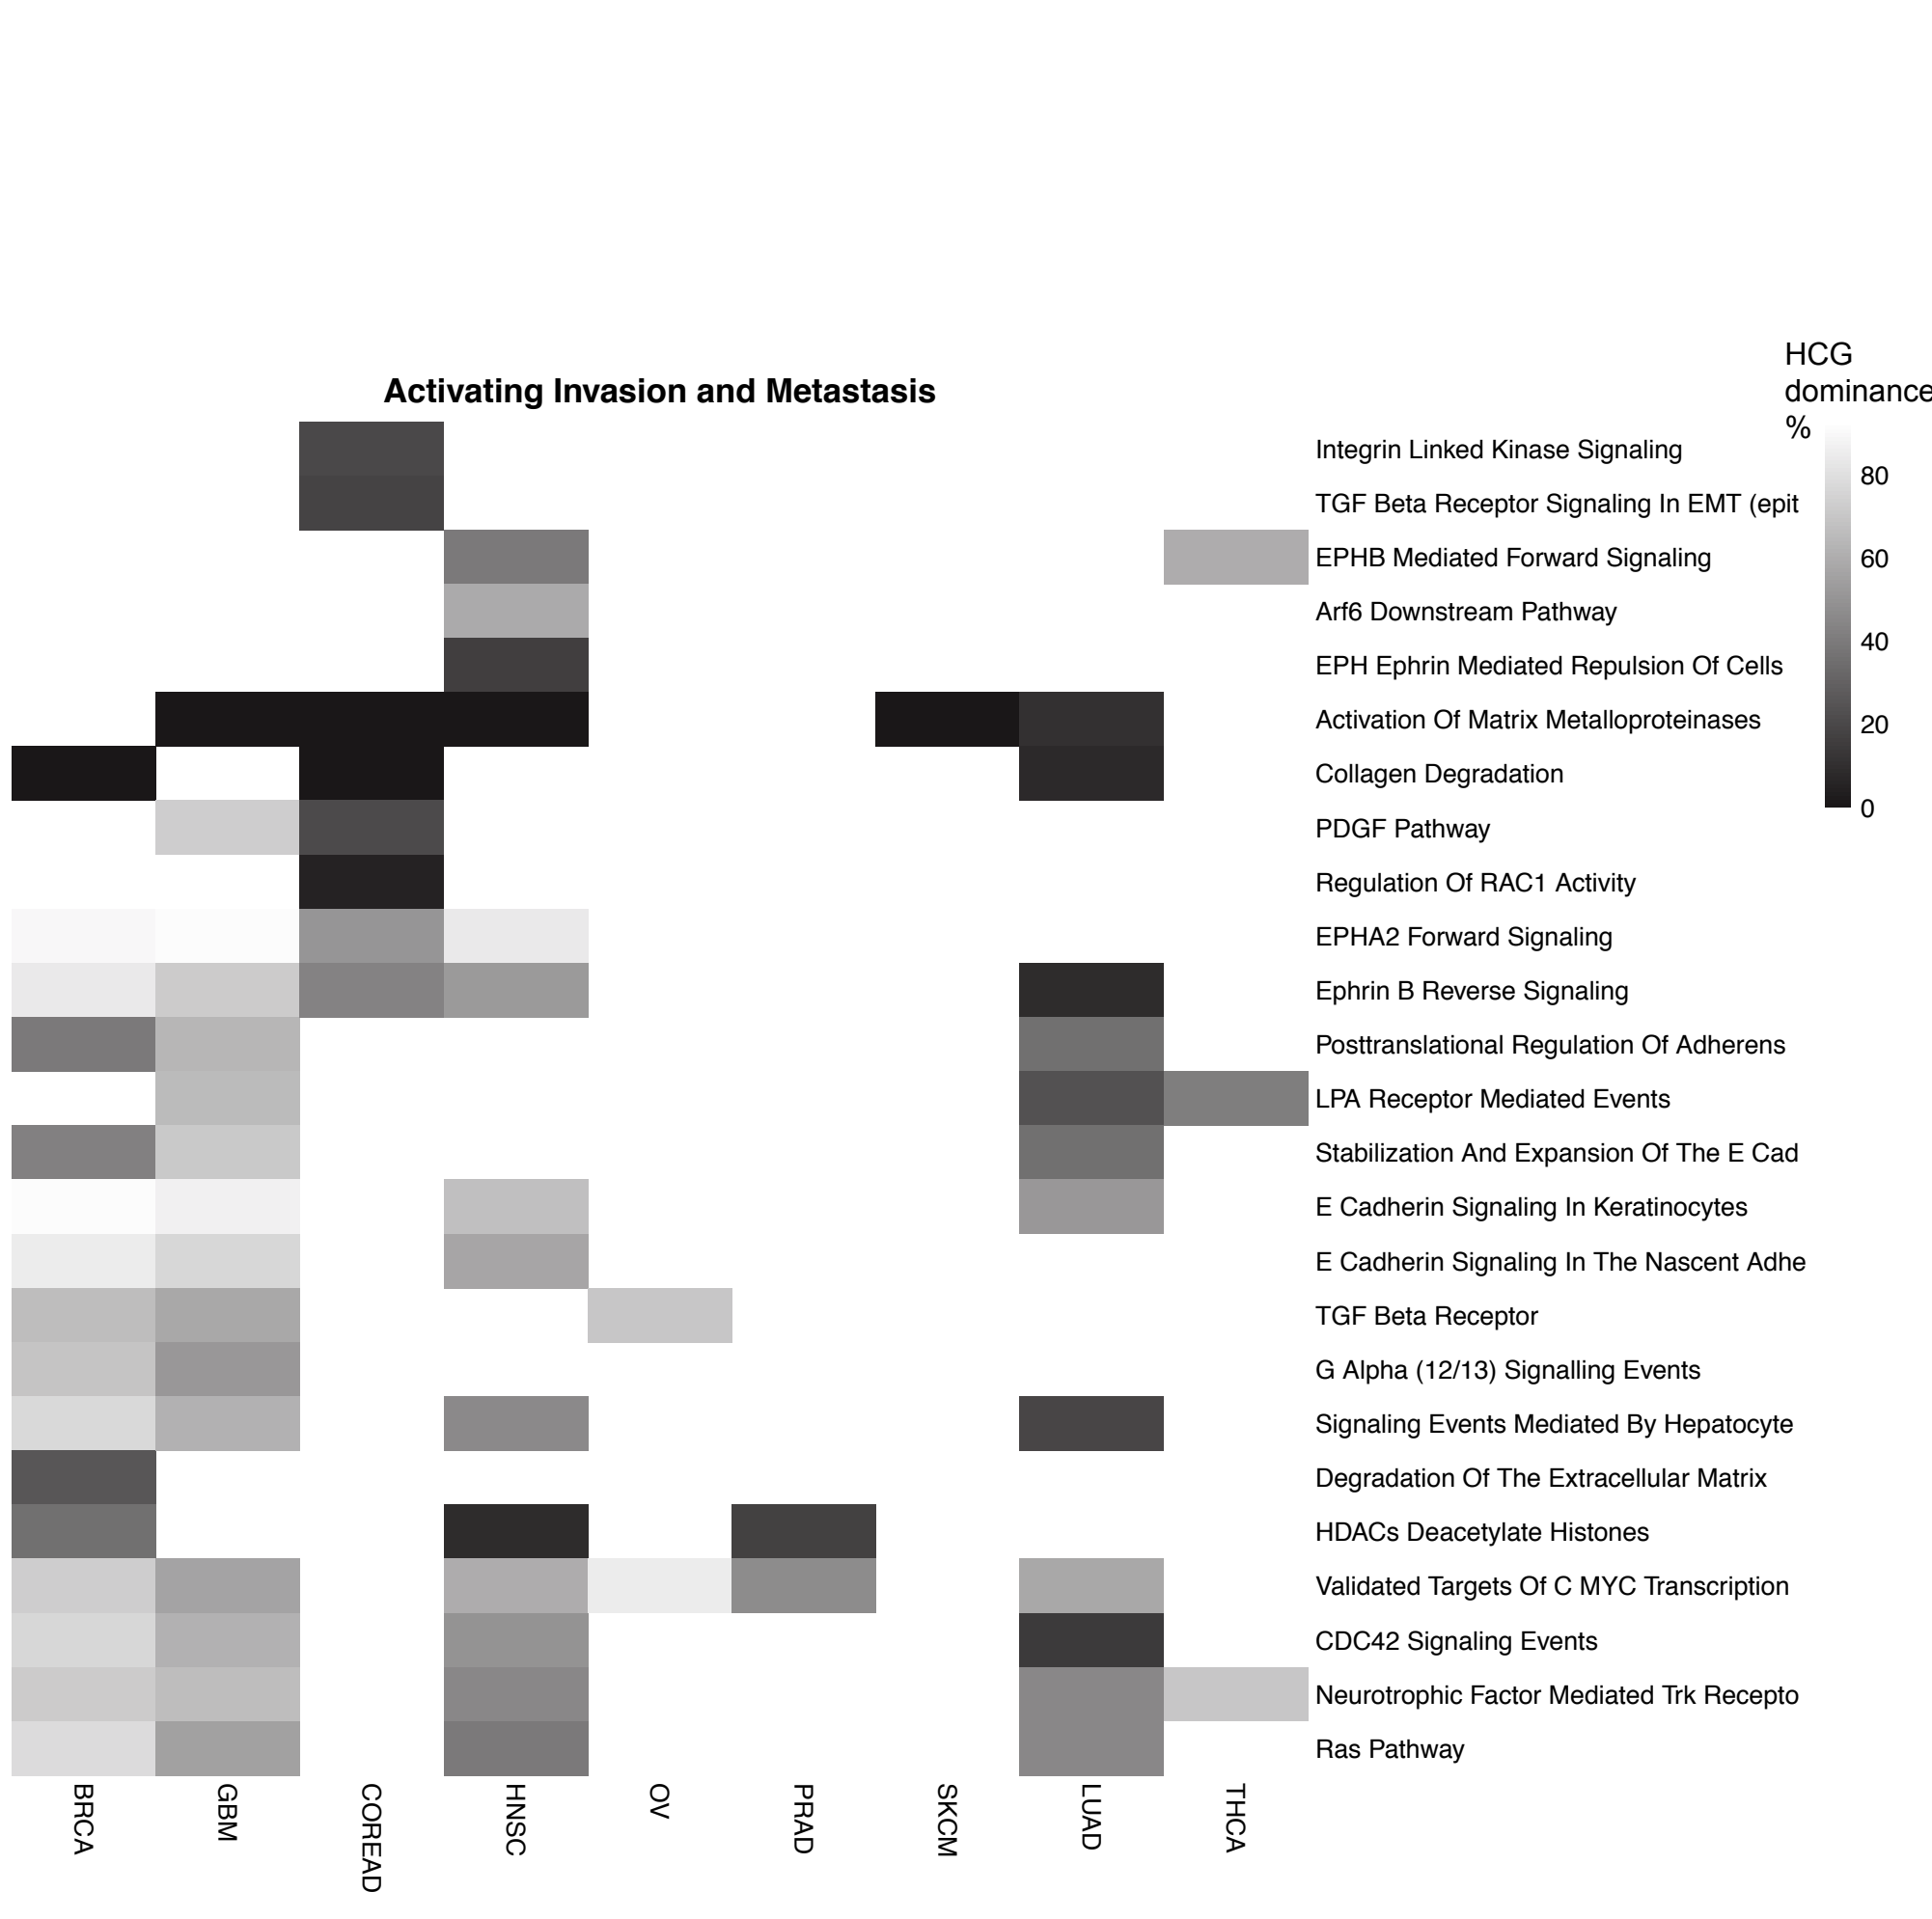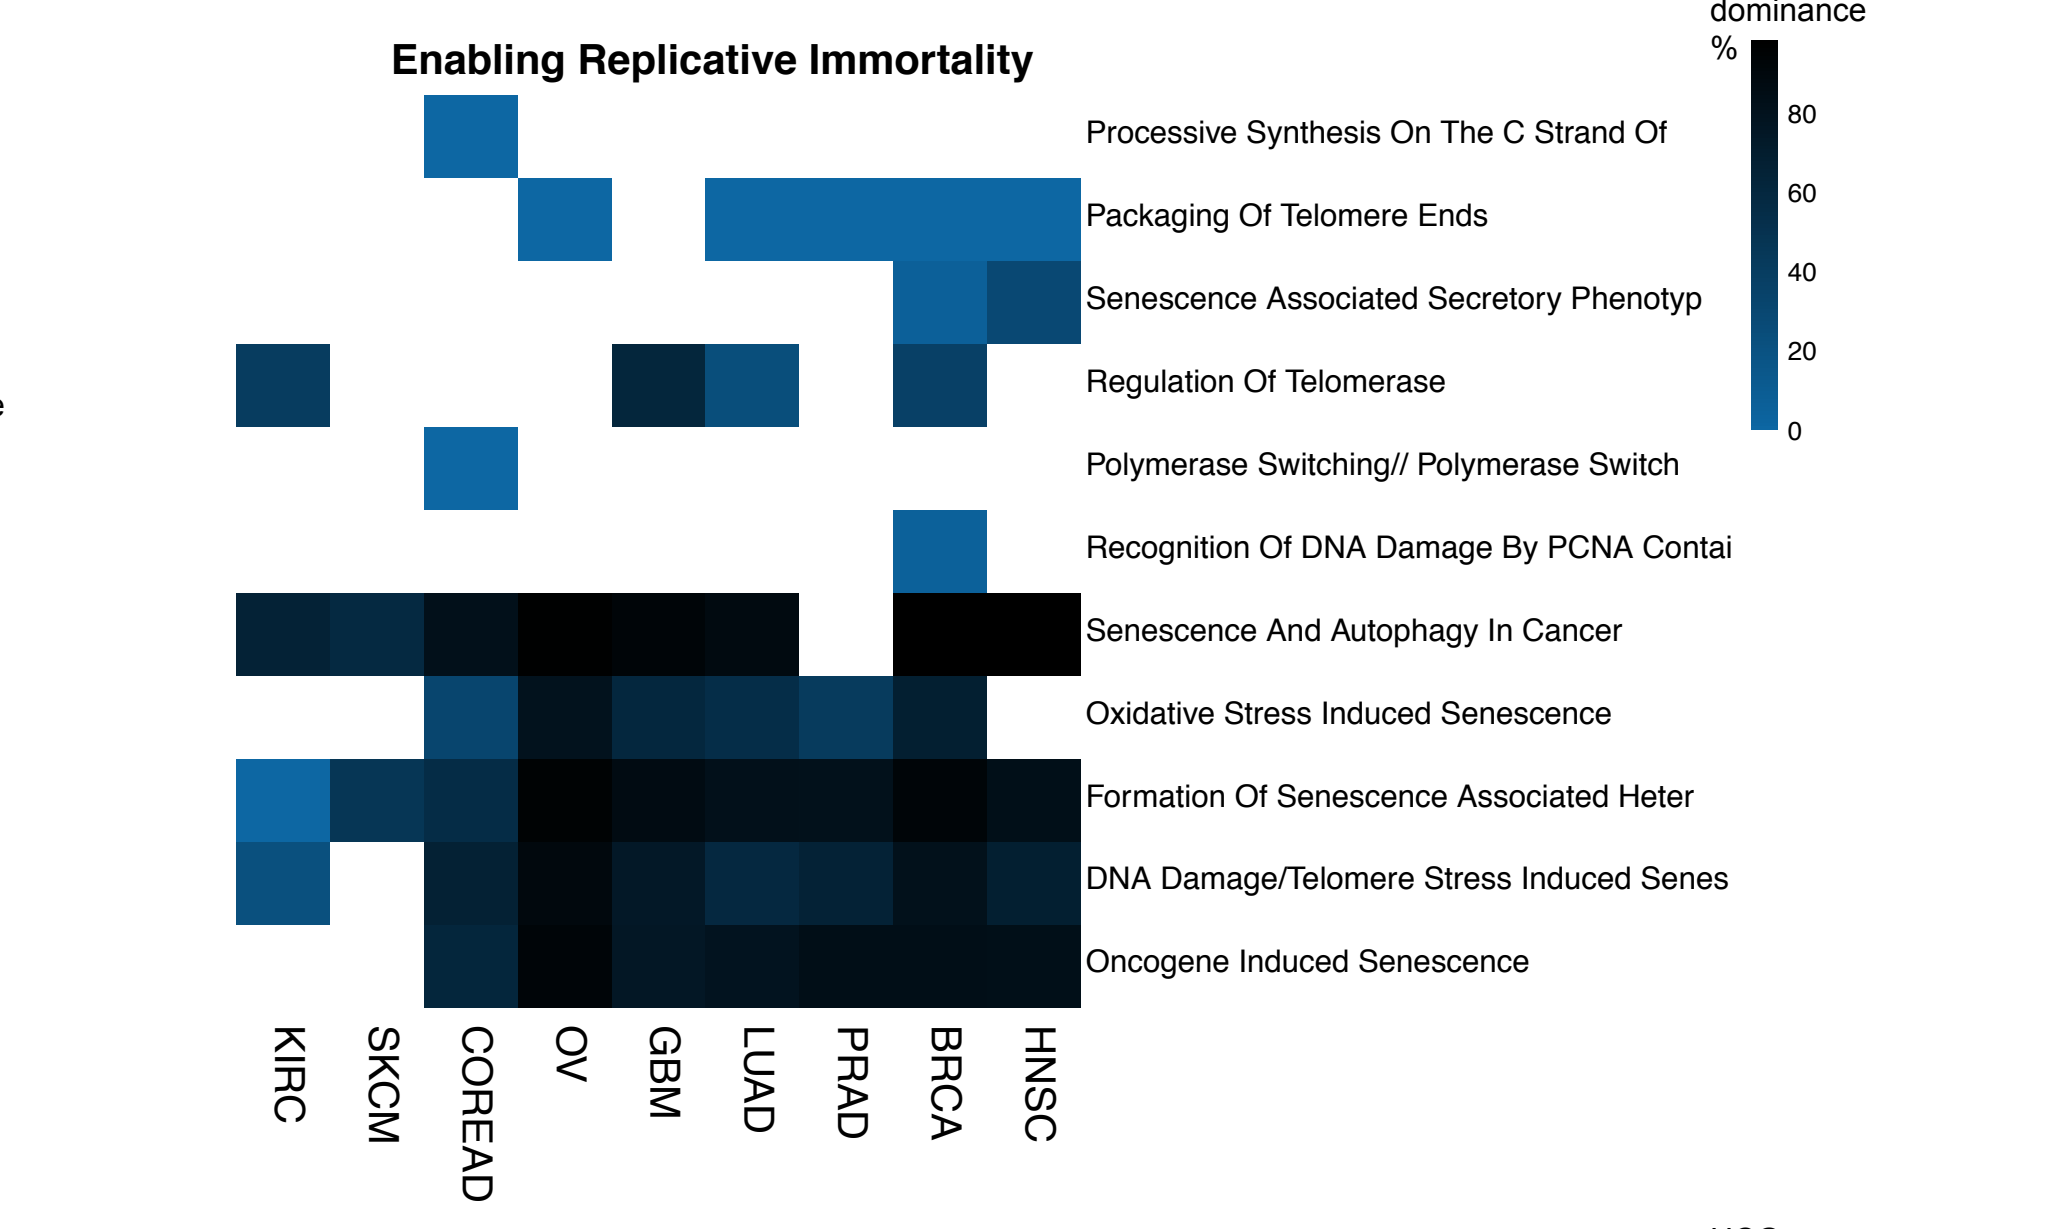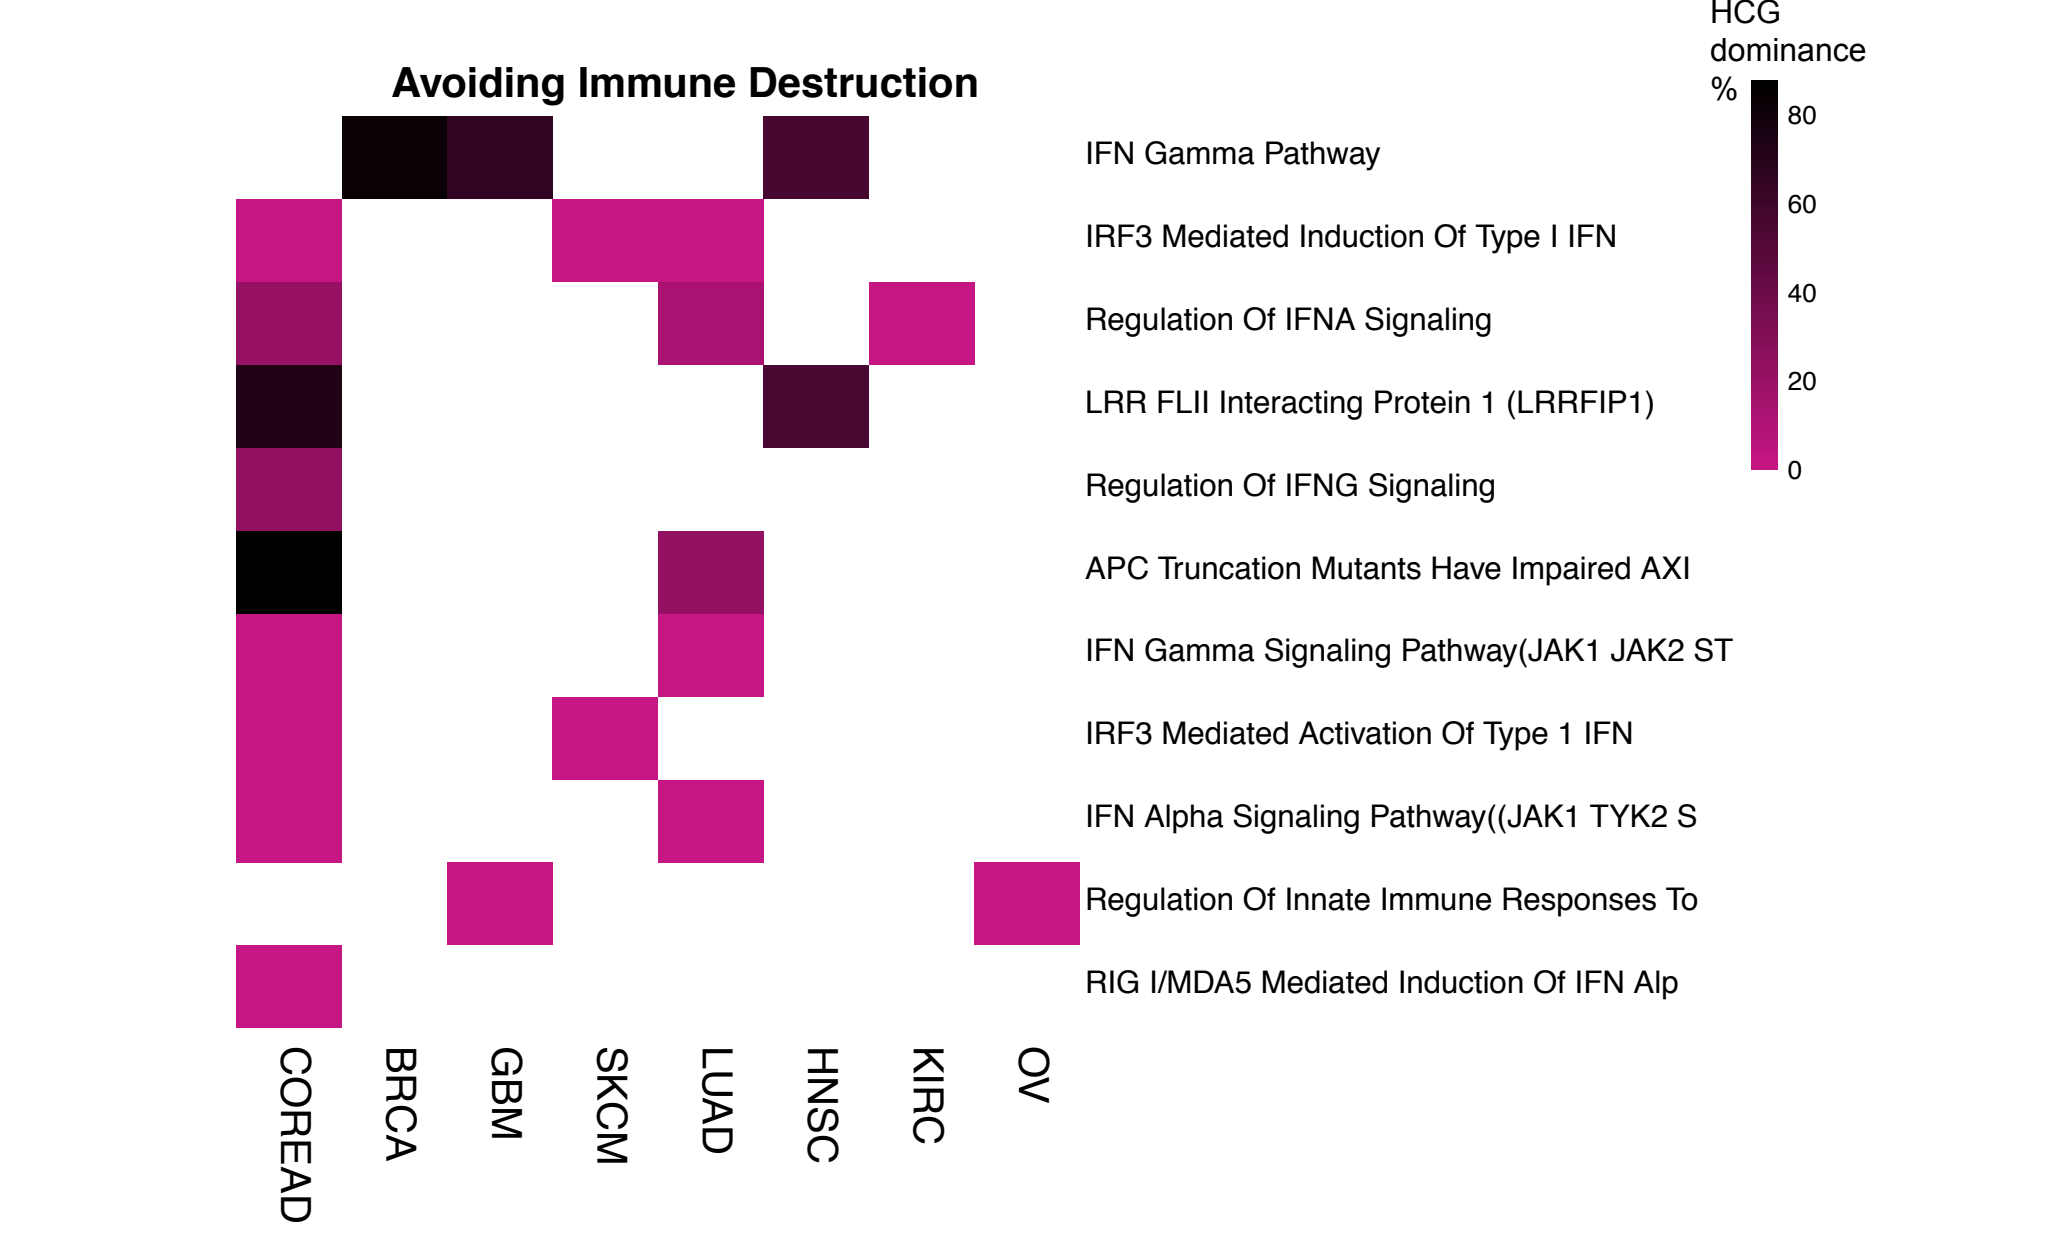

Supplement: Supplementary file [file 077701-5.pdf]
